# Supplementary material for: Male-specific Fruitless isoforms have different regulatory roles conferred by distinct zinc finger DNA binding domains
Source: PubMed Central journal article supplement (PMC3852243; doi:10.1186/1471-2164-14-659), 2013-09-27
Supplement: 1471-2164-14-659-S8.pdf [file 1471-2164-14-659-S8.pdf]

Additional Figure 2

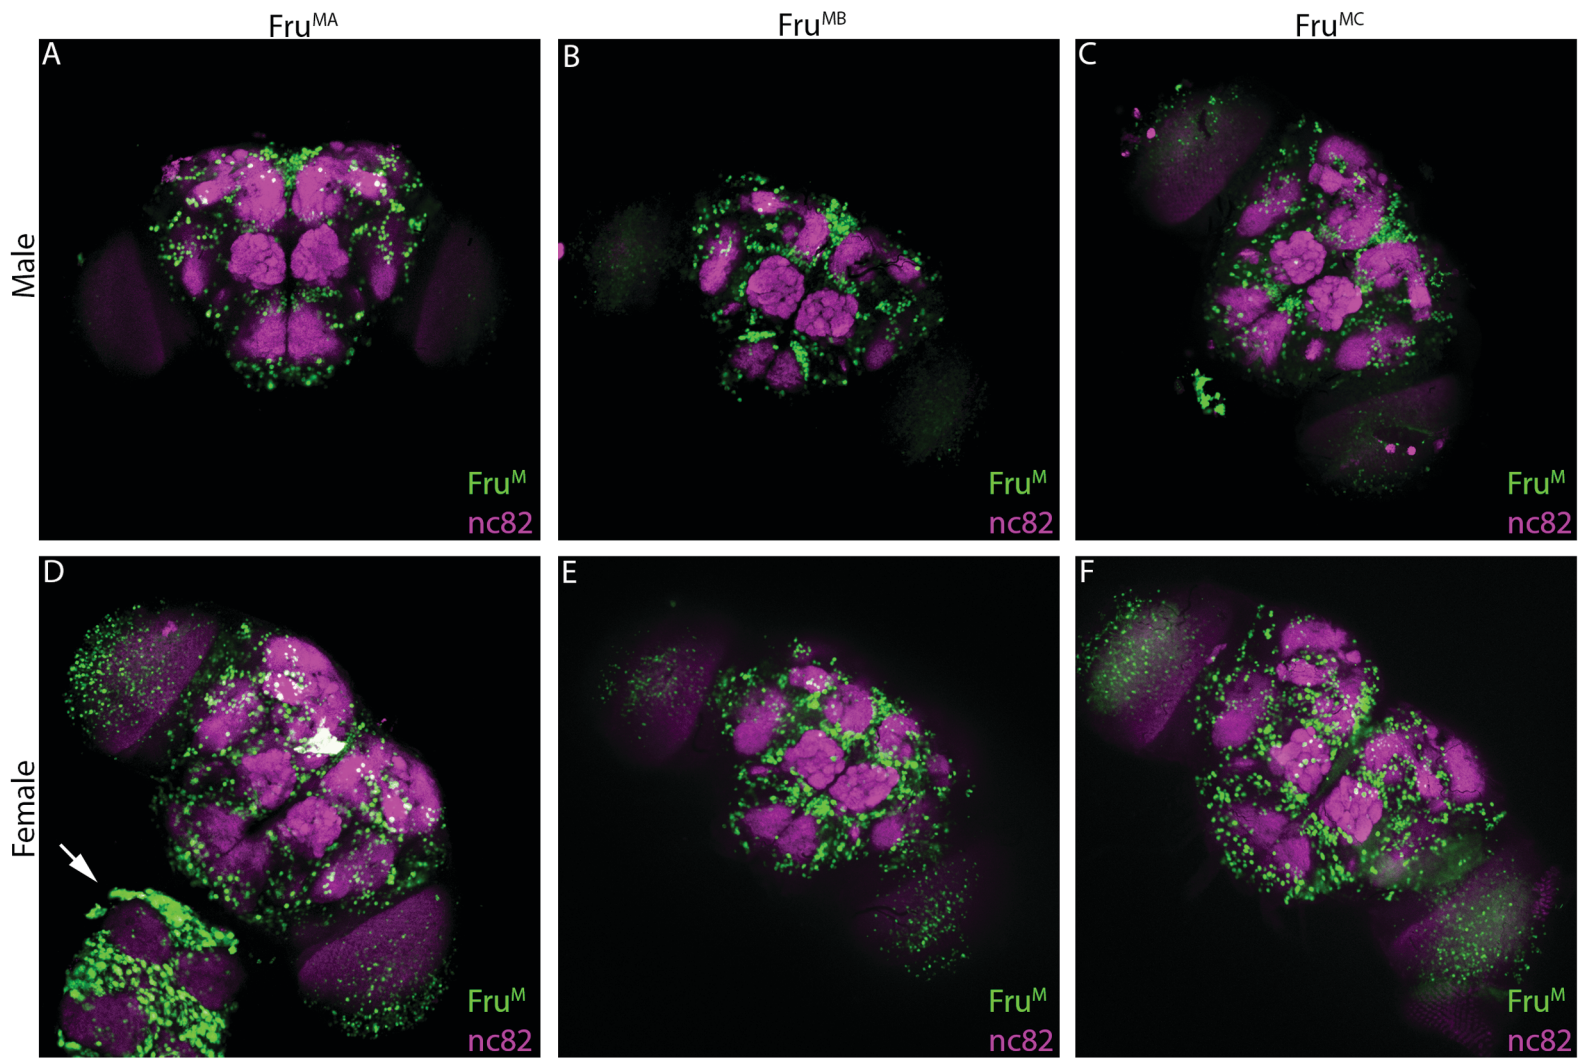

Additional Figure 2: Fru<sup>M</sup> is localized in the *fru P1*-expression pattern in flies over-expressing Fru<sup>MA,B or C</sup>.

(A-F) Immunofluorescence of Fru<sup>M</sup> antibody (green) and the pan-neuronal nc82 antibody (purple) of brains from 0-24 hour adults male (A-C) and female (D-F) animals over-expressing Fru<sup>MA</sup> (A and D), Fru<sup>MB</sup> (B and E) or Fru<sup>MC</sup> (C and F) in *fru P1*-expressing neurons.

[genotypes are: *y w/(w or Y); P(w+mC, UAS-Gal4)/P(w+mC, UAS-Fru<sup>MA, B or C</sup>); fru P1-Gal4/+*].

Images were captured using 20x objective and confocal projections of the anterior z-slices of the brains are shown.

Arrow indicates a portion ventral nerve cord.
