# Supplementary material for: Male-specific Fruitless isoforms have different regulatory roles conferred by distinct zinc finger DNA binding domains
Source: PubMed Central journal article supplement (PMC3852243; doi:10.1186/1471-2164-14-659), 2013-09-27
Supplement: 1471-2164-14-659-S10.pdf [file 1471-2164-14-659-S10.pdf]

# Additional Figure 4

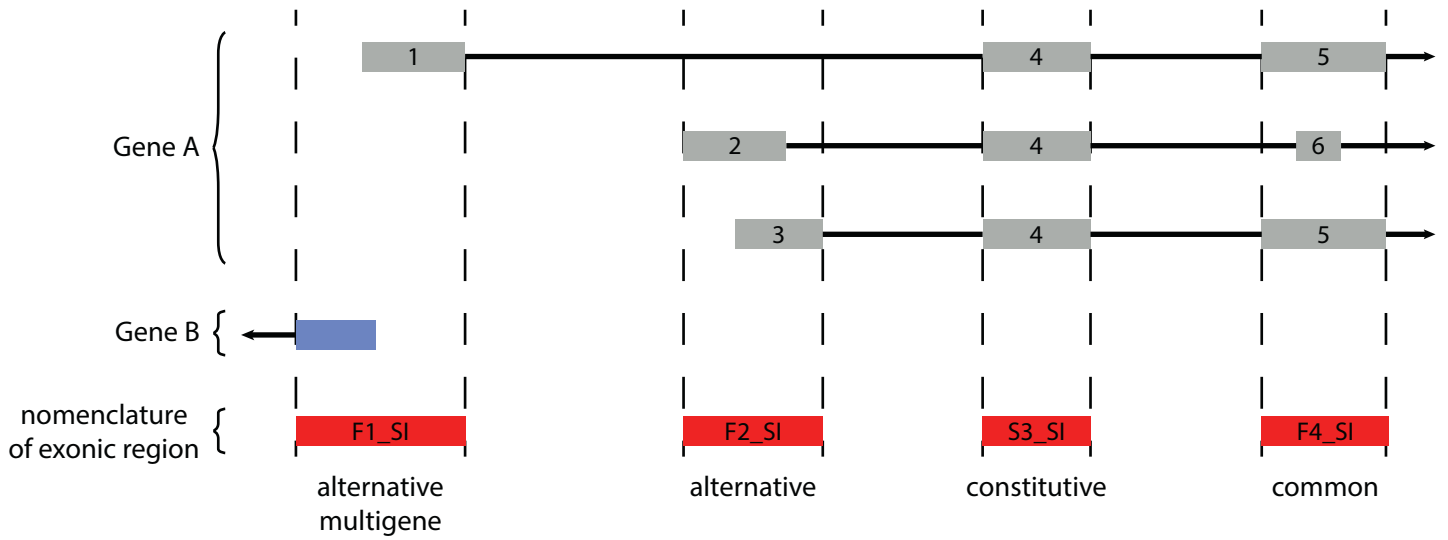

Additional Figure 4: Illustration of Exonic region design and nomenclature. Exonic regions were classified as either belonging to a single exon, S#\_SI, or multiple overlapping exons, F#\_SI. Multiple overlapping exons consist of exons that were from different genes (alternative multigene), overlapping exons due to alternative start and end positions (alternative), or exonic regions present in all isoforms (common).
